# Supplementary material for: The chemistry and histology of sexually dimorphic mental glands in the freshwater turtle,Mauremys leprosa
Source: PeerJ journal article supplement (doi:10.7717/peerj.9047), 2020-05-15

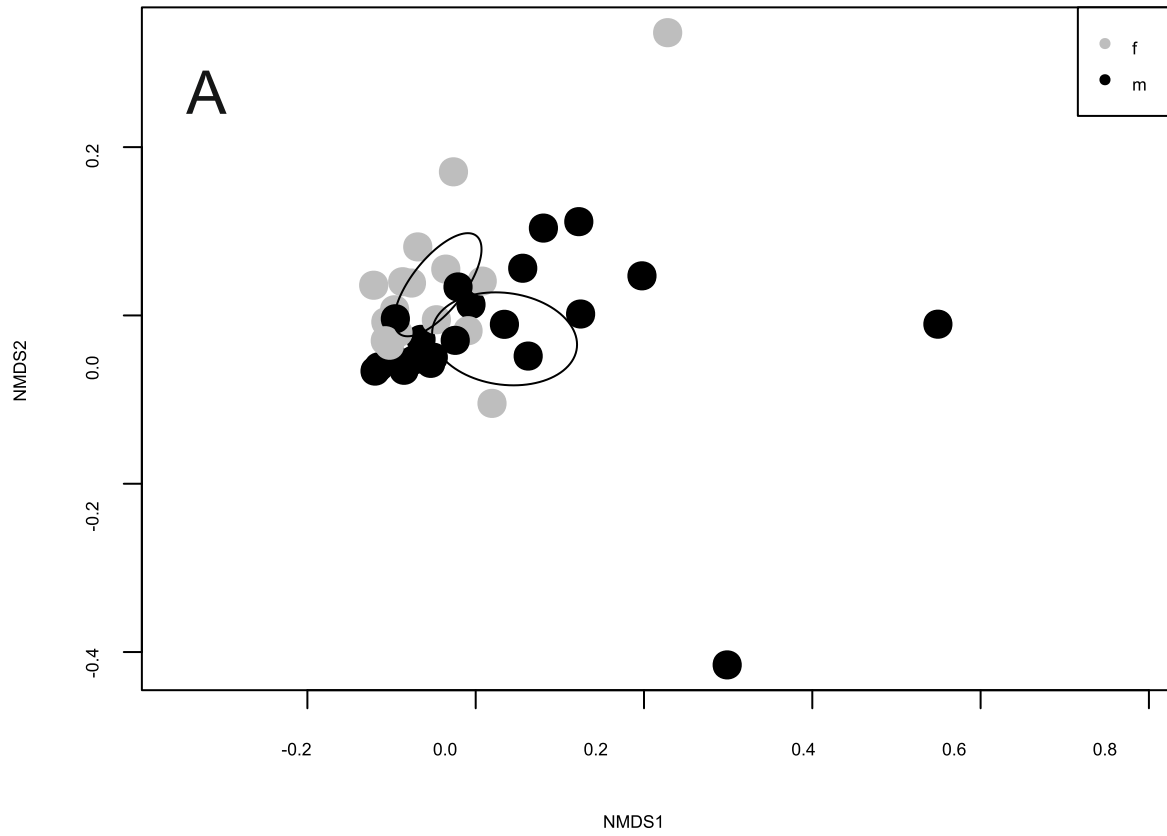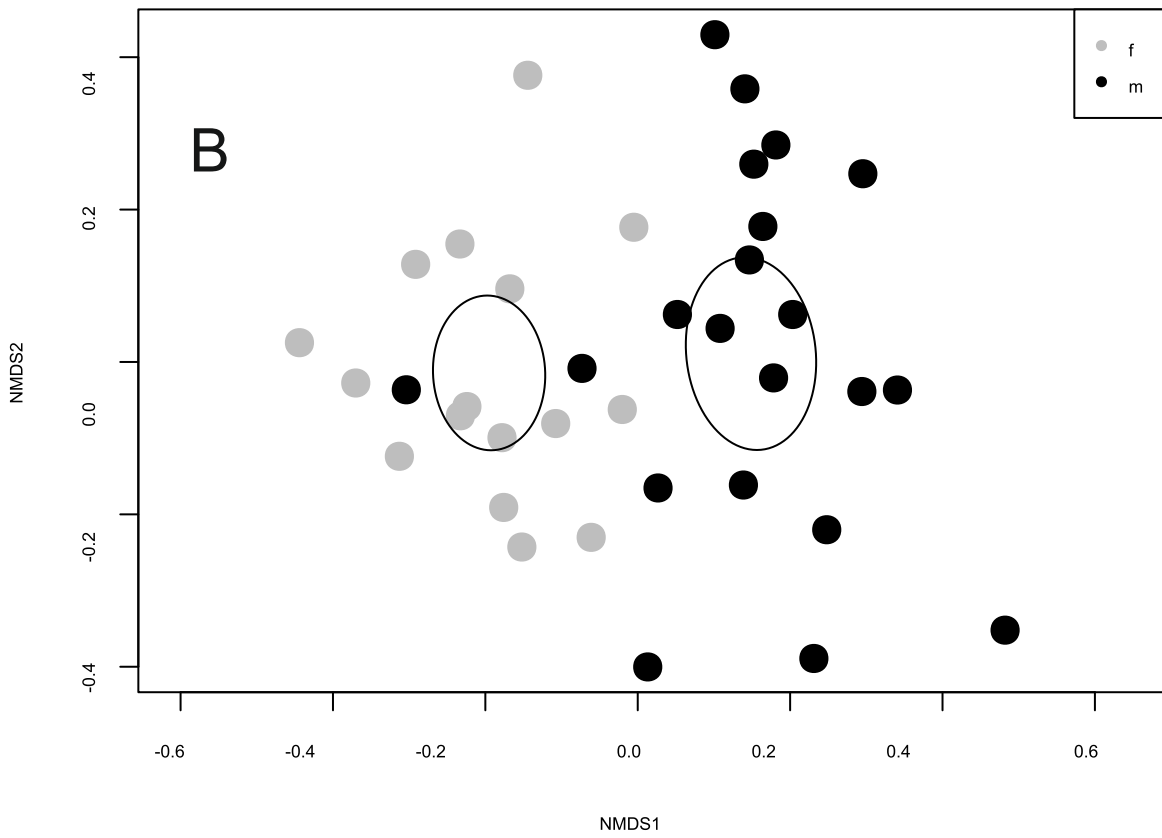

Supplement: FigS1_NMDS_Percentages_05.03.2020.pdf [file FigS1_NMDS_Percentages_05.03.2020.pdf]
