# Supplementary material for: The chemistry and histology of sexually dimorphic mental glands in the freshwater turtle,Mauremys leprosa
Source: PeerJ journal article supplement (doi:10.7717/peerj.9047), 2020-05-15

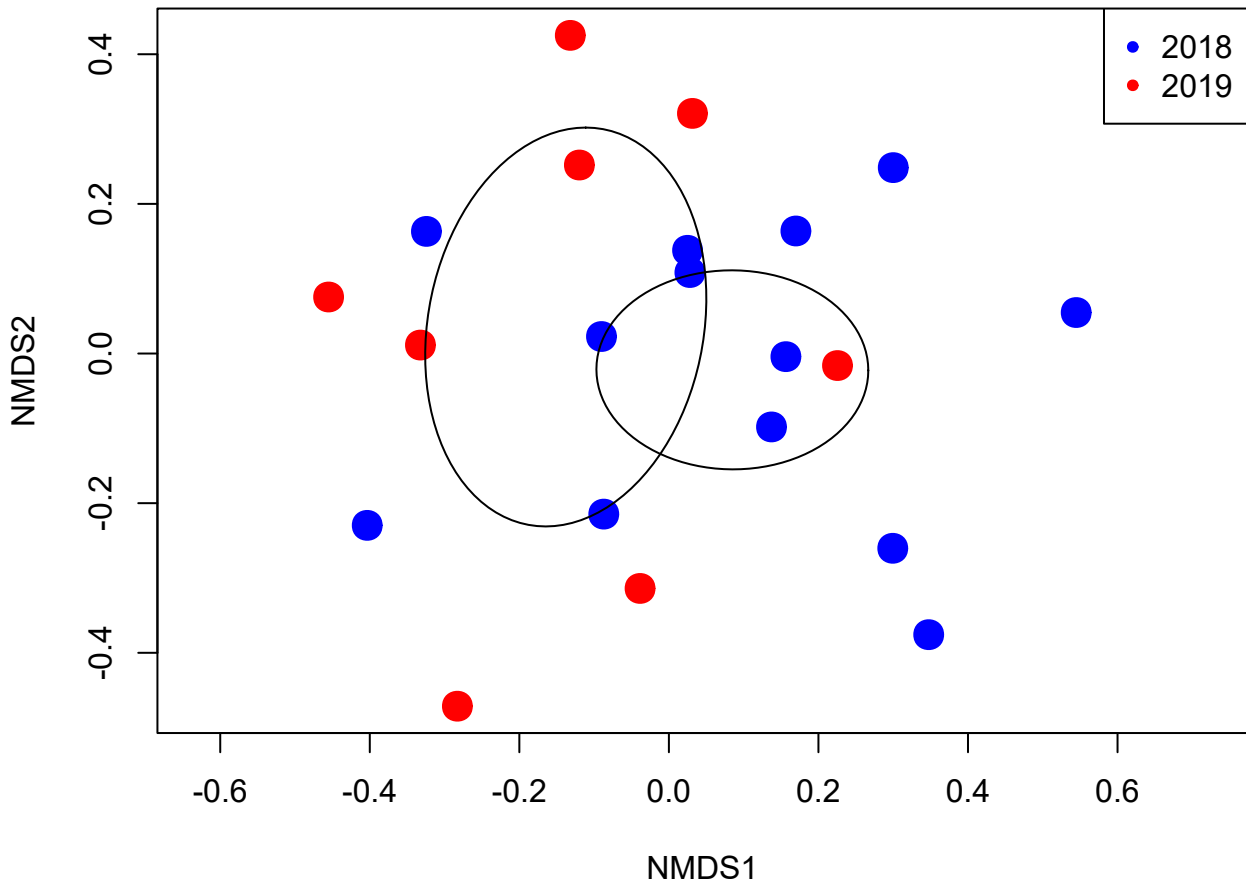

Supplement: FigS3_NMDS_Males_NoCholest_Ratios_Year_10.01.2020.pdf [file FigS3_NMDS_Males_NoCholest_Ratios_Year_10.01.2020.pdf]
